# Supplementary figures and images for: Notch signaling promotes airway mucous metaplasia and inhibits alveolar development
Source: Oxford University Press journal article supplement (doi:10.1242/dev.029249), 2009-04-16

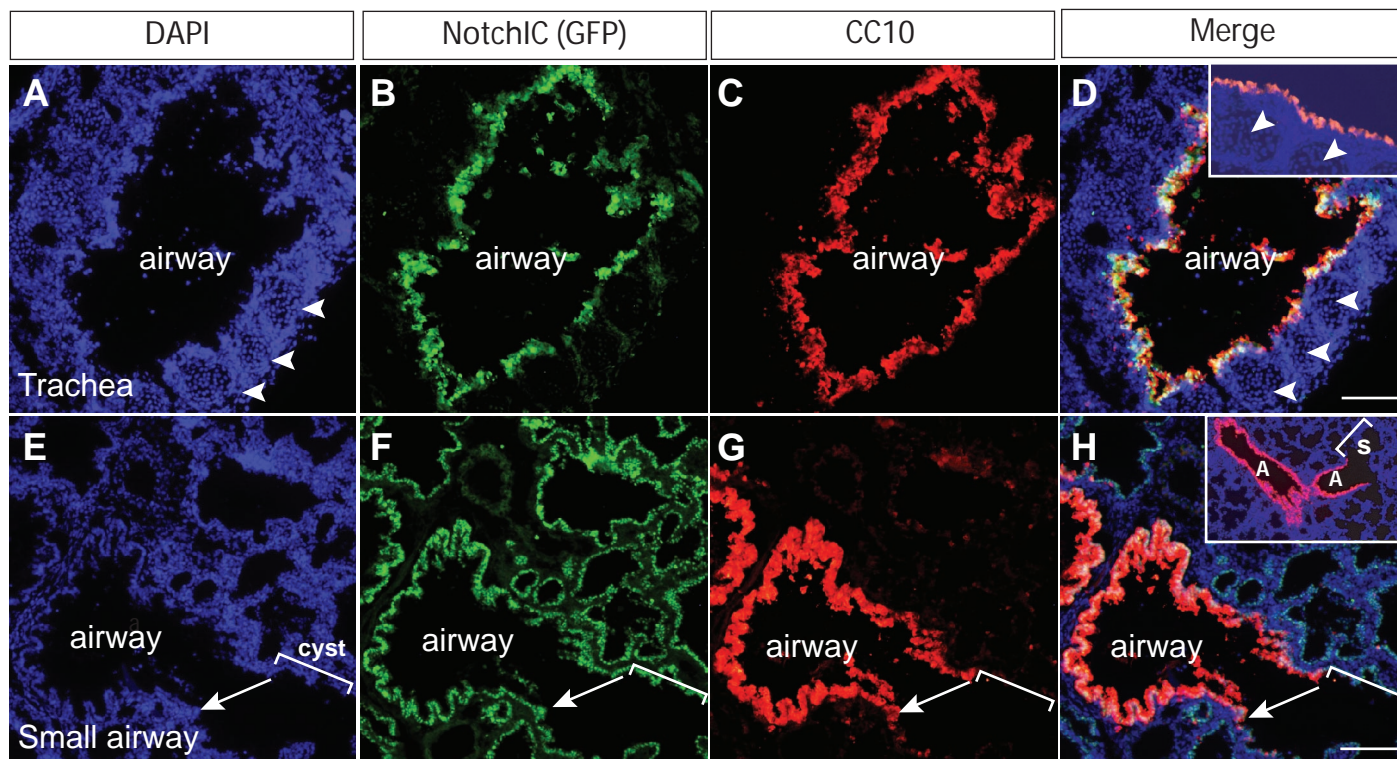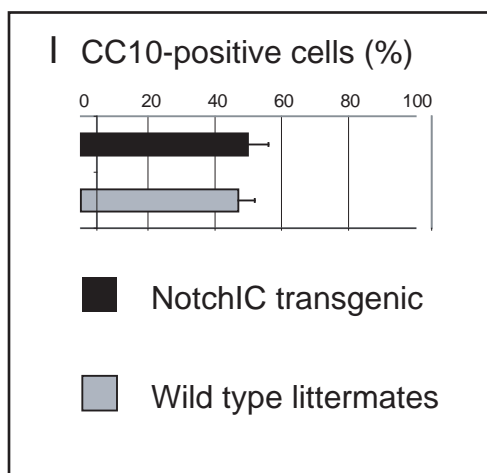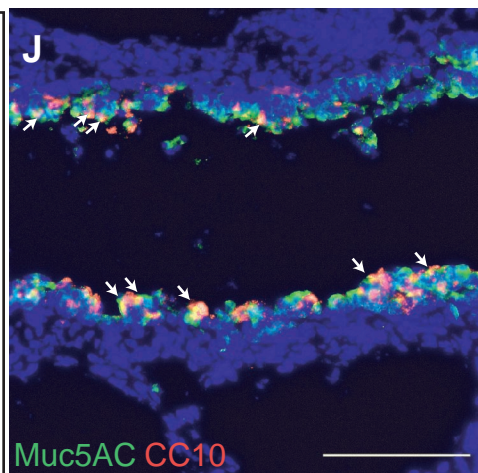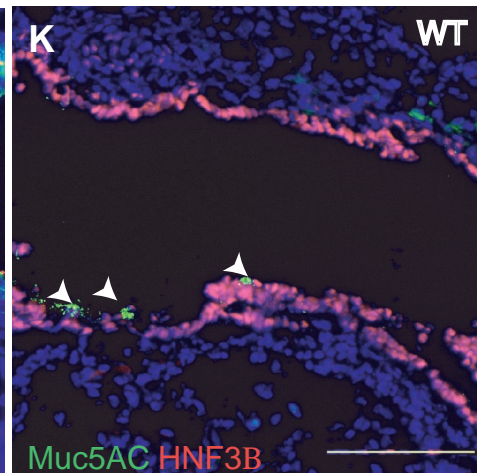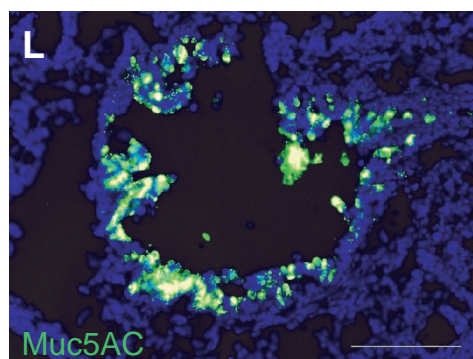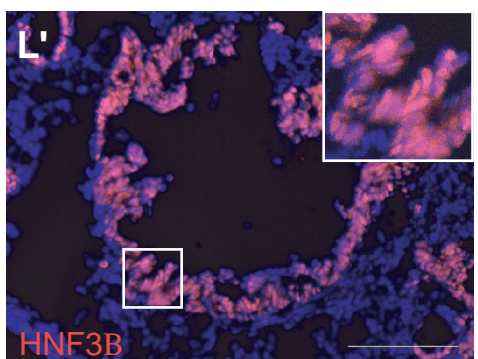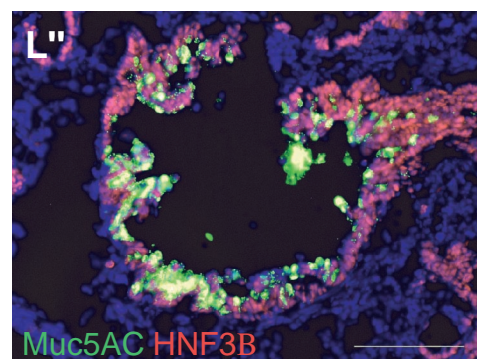

Supplement: dev029249-sup-029249-figs2.pdf [file dev029249-sup-029249-figs2.pdf]
